# Supplementary material for: Involvement of older people in the development of fall detection systems: a scoping review
Source: Springer Nature journal article supplement (doi:10.1186/s12877-016-0216-3), 2016-02-11
Supplement: MOESM1 [file 9738968]

## Involvement of Older People in the Development of Fall Detection Systems: A Scoping Review

Table 1: General aspects of literature involving older people in the development of fall detection systems

| Author(s) and year    | Country                                           | Design      | Type of fall detection system                    |                                    |                                                         |                                                                                                                                        | Fall detection alert (yes / no) | Involved older people |                                 |                    |                                       |
|-----------------------|---------------------------------------------------|-------------|--------------------------------------------------|------------------------------------|---------------------------------------------------------|----------------------------------------------------------------------------------------------------------------------------------------|---------------------------------|-----------------------|---------------------------------|--------------------|---------------------------------------|
|                       |                                                   |             | Wearable                                         | Placement                          | Environmental                                           | Placement                                                                                                                              |                                 | Sample size (n)       | Mean age in years (range or SD) | Gender: female (n) | Length of test time in day(s) (range) |
| Abbate et al (2012)   | Italy                                             | Exploratory | Sensor / Smartphone (accelerometer)              | Waist / belt                       | N.a.                                                    | N.a.                                                                                                                                   | Yes                             | 10                    | N.s. * <sup>1</sup> (60-82)     | 4                  | N.a. * <sup>2</sup>                   |
| Ariani et al (2010)   | Australia                                         | Exploratory | N.a.                                             | N.a.                               | Passive infrared sensors (PIRs) and Pressure mats (PMs) | PIR wall mounted and PM in front of doorway of every room; PM on bed, on chair, on the floor in front of toilet seat, shower and sofa. | Yes                             | 10                    | N.s. (50-70)                    | 5                  | N.s.                                  |
| Barralon et al (2013) | Spain                                             | Evaluation  | Mobile Telecare device (accelerometer)           | Waist                              | Shower Rug (pressure sensors)                           | Bathroom                                                                                                                               | Yes                             | 20                    | N.s. (55-82)                    | N.s.               | (approx. 7- 90)                       |
| Bloch et al (2011)    | France                                            | Evaluation  | Vigi'Fall® (accelerometer)                       | Thorax                             | Infrared sensor                                         | Room (not specified)                                                                                                                   | Yes                             | 10                    | 83 (7.5)                        | N.s.               | σ = 21 (SD 19)                        |
| Bourke et al (2008a)  | Ireland                                           | Exploratory | Sensor (bi-axial gyroscope)                      | Trunk                              | N.a.                                                    | N.a.                                                                                                                                   | No                              | 10                    | 77 (70-83)                      | 3                  | N.s.                                  |
| Bourke et al (2007)   | Ireland                                           | Exploratory | Sensor (tri-axial accelerometer)                 | Trunk & thigh                      | N.a.                                                    | N.a.                                                                                                                                   | No                              | 10                    | 77 (70-83)                      | 3                  | N.s.                                  |
| Bourke et al (2012)   | Germany, Ireland, Portugal, Spain, United Kingdom | Exploratory | Sensors (tri-axial accelerometer) & mobile phone | Chest, left under arm, right thigh | N.a.                                                    | N.a.                                                                                                                                   | Yes                             | 8                     | 77 (5)                          | N.s.               | N.s.                                  |
|                       |                                                   |             |                                                  |                                    |                                                         |                                                                                                                                        |                                 | 6                     | 77 (5)                          | N.s.               | 5                                     |
|                       |                                                   |             |                                                  |                                    |                                                         |                                                                                                                                        |                                 | 9                     | 69 (14)                         | 4                  | 28                                    |
| Bourke et al          | Ireland                                           | Exploratory | Sensors / mobile                                 | Waist                              | N.a.                                                    | N.a.                                                                                                                                   | No                              | 10                    | 79 (73-                         | 4                  | 3-7                                   |

| Author(s) and year         | Country   | Design      | Type of fall detection system                                        |                         |                                          |                                                                                  | Fall detection alert (yes / no) | Involved older people |                                 |                    |                                       |
|----------------------------|-----------|-------------|----------------------------------------------------------------------|-------------------------|------------------------------------------|----------------------------------------------------------------------------------|---------------------------------|-----------------------|---------------------------------|--------------------|---------------------------------------|
|                            |           |             | Wearable                                                             | Placement               | Environmental                            | Placement                                                                        |                                 | Sample size (n)       | Mean age in years (range or SD) | Gender: female (n) | Length of test time in day(s) (range) |
| (2010a)                    |           |             | phone (tri-axial accelerometer)                                      |                         |                                          |                                                                                  |                                 | 90)                   |                                 |                    | hours per participant                 |
| Bourke et al (2010b)       | Ireland   | Evaluation  | Sensors (tri-axial accelerometer)                                    | Waist (belt)            | N.a.                                     | N.a.                                                                             | No                              | 10                    | 79 (73-90)                      | 4                  | <8 hours per participant              |
| Bourke et al (2008b)       | Ireland   | Exploratory | Sensor (tri-axial accelerometer) & mobile phone integrated in a vest | left upper arm or chest | N.a.                                     | N.a.                                                                             | Yes                             | 10                    | N.s., elderly                   | N.s.               | 24 (8 hours a day, 6 days a week)     |
| Bourke et al (2010c)       | Ireland   | Evaluation  | Sensor (tri-axial accelerometer)                                     | Waist                   | N.a.                                     | N.a.                                                                             | No                              | 10                    | 79 (73-90)                      | 4                  | 3-7 hours per participant             |
| Bourke et al (2008c)       | Ireland   | Exploratory | Sensor (tri-axial accelerometer) integrated in a vest & mobile phone | left upper arm or chest | N.a.                                     | N.a.                                                                             | Yes                             | 10                    | N.s., elderly                   | N.s.               | 24 (8 hours a day, 6 days a week)     |
| Boyle & Karunanithi (2008) | Australia | Exploratory | PAL Technologies (accelerometer)                                     | Waist (belt)            | N.a.                                     | N.a.                                                                             | No                              | 15                    | 67 (18)                         | N.s.               | ≈18 (2-81)                            |
| Campo et al (2010)         | France    | Exploratory | N.a.                                                                 | N.a.                    | Infrared sensors (motion sensor network) | Placed on ceiling to focus bed and around bed, in bathroom, near chair and table | Yes                             | 1                     | 75 (N.s)                        | N.s.               | N.s.                                  |
| Che-Chang et al (2007)     | Taiwan    | Exploratory | Sensor (tri-axial accelerometer)                                     | Waist (belt)            | N.a.                                     | N.a.                                                                             | No                              | 5                     | N.s., elderly                   | N.s                | N.s                                   |
| De la Guia                 | Ireland   | Exploratory | Sensor (tri-axial accelerometer)                                     | Trunk                   | N.a.                                     | N.a.                                                                             | No                              | 10                    | 77 (70-                         | 3                  | N.s.                                  |

| Author(s) and year          | Country                       | Design                  | Type of fall detection system                                 |                             |                                                                                 |                               | Fall detection alert (yes / no) | Involved older people |                                 |                    |                                       |
|-----------------------------|-------------------------------|-------------------------|---------------------------------------------------------------|-----------------------------|---------------------------------------------------------------------------------|-------------------------------|---------------------------------|-----------------------|---------------------------------|--------------------|---------------------------------------|
|                             |                               |                         | Wearable                                                      | Placement                   | Environmental                                                                   | Placement                     |                                 | Sample size (n)       | Mean age in years (range or SD) | Gender: female (n) | Length of test time in day(s) (range) |
| Solaz et al (2010)          |                               |                         | accelerometer)                                                |                             |                                                                                 |                               |                                 | 83)                   |                                 |                    |                                       |
| Demiris et al (2004)        | USA                           | Qualitative descriptive | Fall detection technologies amongst other health technologies |                             |                                                                                 |                               | N.a.                            | 15                    | N.s. (65<)                      | 8                  | N.a.                                  |
| Fourty et al (2009)         | France, Spain                 | Exploratory             | Portable system (bi-axial accelerometer)                      | N.s.                        | N.a.                                                                            | N.a.                          | Yes                             | 9                     | 76 (N.s)                        | 6                  | N.s.                                  |
| Marquis-Faulkes & al (2005) | UK                            | Qualitative descriptive | N.a.                                                          | N.a.                        | Camera                                                                          | Ceiling-mounted               | Yes                             | 31                    | N.s. (65<)                      | N.s. clearly       | N.a.                                  |
| Gietzelt et al (2012)       | Germany                       | Evaluation              | Sensor (tri-axial accelerometer)                              | Chest                       | Camera                                                                          | Wall-mounted                  | No                              | 3                     | 87 (81-92)                      | 1                  | 60 - Approx. 10h / day                |
| Godfrey et al (2011)        | UK, Ireland,                  | Exploratory             | Sensor (tri-axial accelerometer)                              | Chest                       | N.a.                                                                            | N.a.                          | No                              | 10                    | 77 (70-83)                      | 3                  | N.s.                                  |
| Goevercin et al (2010)      | Germany                       | Qualitative descriptive | N.a.                                                          | N.a.                        | surveillance camera type, motion detector, fish-eye type camera, in-wall camera | Room: wall or in-wall mounted | No                              | 22                    | 70 (50-85)                      | 16                 | N.a.                                  |
| Holzinger et al (2010)      | Germany, Austria, Switzerland | Evaluation              | Watch (accерometer)                                           | Wrist                       | N.a.                                                                            | N.a.                          | Yes                             | N.s. clearly          | N.s. (55<)                      | N.s.               | N.a.                                  |
| Horton (2008)               | UK                            | Observational           | pendant alarm or fall detector                                | Neck or worn on body (N.s.) | Bed occupancy sensor                                                            | Under mattress                | Yes                             | 35                    | 78 (65<)                        | 22                 | Weeks: 15 (4)                         |
| Huang et al (2012)          | Taiwan                        | Exploratory             | Sensor (tri-axial accelerometer)                              | Wrist                       | N.a.                                                                            | N.a.                          | No                              | 3                     | 80 (11)                         | N.s.               | N.s.                                  |
| Jantaraprim et al (2012)    | Thailand                      | Exploratory             | Sensor (tri-axial accelerometer)                              | Trunk                       | N.a.                                                                            | N.a.                          | No                              | 14                    | 68 (4)                          | 7                  | N.s.                                  |

| Author(s) and year     | Country              | Design                  | Type of fall detection system                                 |                                       |                                          |                                     | Fall detection alert (yes / no) | Involved older people |                                 |                    |                                       |
|------------------------|----------------------|-------------------------|---------------------------------------------------------------|---------------------------------------|------------------------------------------|-------------------------------------|---------------------------------|-----------------------|---------------------------------|--------------------|---------------------------------------|
|                        |                      |                         | Wearable                                                      | Placement                             | Environmental                            | Placement                           |                                 | Sample size (n)       | Mean age in years (range or SD) | Gender: female (n) | Length of test time in day(s) (range) |
| Kangas et al (2012)    | Finland, Sweden      | Exploratory             | Sensor (3D accelerometer)                                     | Waist                                 | N.a.                                     | N.a.                                | No                              | 16                    | 88 (5)                          | 13                 | N.s. (60-180)                         |
| Kangas et al (2009)    | Finland, Sweden      | Exploratory             | Sensor (tri-axial accelerometer)                              | Waist                                 | N.a.                                     | N.a.                                | No                              | 21                    | 83 (9)                          | 10                 | N.s.                                  |
| Kerdegar et al (2012)  | Malaysia             | Exploratory             | Sensor (accelerometer)                                        | Waist                                 | N.a.                                     | N.a.                                | No                              | 1                     | 65 (N.s)                        | N.s.               | N.s.                                  |
| Lai et al (2010)       | South Korea          | Exploratory             | Sensors (accelerometer)                                       | Neck, waist, both wrists, both thighs | N.a.                                     | N.a.                                | No                              | 1                     | N.s., elderly                   | N.s.               | N.s.                                  |
| Lai et al (2011)       | Taiwan               | Exploratory             | Sensors (tri-axial accelerometer)                             | Both hands, trunk, both feet          | N.a.                                     | N.a.                                | No                              | 16                    | N.s., elderly                   | N.s.               | N.s.                                  |
| Lindemann et al (2005) | Germany              | Exploratory             | Sensors (accelerometer)                                       | Head (hearing aid housing)            | N.a.                                     | N.a.                                | No                              | 1                     | 83 (N.s)                        | 1                  | N.s.                                  |
| Shinmoto et al (2013)  | Australia, USA       | Exploratory             | Sensor (accelerometer)                                        | Sternum                               | N.a.                                     | N.a.                                | No                              | 14                    | N.s. (66-86)                    | N.s.               | N.s.                                  |
| Liu & Lockhart (2013)  | USA                  | Exploratory             | Inertial measurement unit & sensor (tri-axial accelerometer)  | Thigh / trunk                         | N.a.                                     | N.a.                                | No                              | 10                    | 75 (6)                          | N.s.               | N.s.                                  |
| Londei et al (2009)    | Canada               | Mixed Method            | N.a.                                                          | N.a.                                  | Intelligent videomonitoring system (IVS) | Room(s) at home (N.s.)              | Yes                             | 25                    | 79 (65-87)                      | 19                 | N.s.                                  |
| McKenna et al (2006)   | UK                   | Qualitative descriptive | N.a.                                                          | N.a.                                  | Vision-based monitoring                  | N.a.                                | Yes                             | N.s. clearly          | N.s (65<)                       | N.s.               | N.a.                                  |
| Yu et al (2013)        | China                | Exploratory             | N.a.                                                          | N.a.                                  | Camera                                   | Room, wall-mounted close to ceiling | No                              | 1                     | N.s., old person                | N.s.               | N.s.                                  |
| Narasimhan (2012)      | USA                  | Exploratory             | Sensors (tri-axial accelerometer)                             | Torso                                 | N.a.                                     | N.a.                                | No                              | 15                    | 74 (63 – 91)                    | 5                  | N.s.                                  |
| Parker et al (2008)    | Austria, UK, Ireland | Descriptive             | Fall detection technologies amongst other health technologies |                                       |                                          |                                     | N.a.                            | 97                    | 76 (57-94)                      | 65                 | N.a.                                  |

| Author(s) and year          | Country    | Design      | Type of fall detection system                  |                            |                                                                                                                                    |                                                                 | Fall detection alert (yes / no) | Involved older people    |                                 |                    |                                          |
|-----------------------------|------------|-------------|------------------------------------------------|----------------------------|------------------------------------------------------------------------------------------------------------------------------------|-----------------------------------------------------------------|---------------------------------|--------------------------|---------------------------------|--------------------|------------------------------------------|
|                             |            |             | Wearable                                       | Placement                  | Environmental                                                                                                                      | Placement                                                       |                                 | Sample size (n)          | Mean age in years (range or SD) | Gender: female (n) | Length of test time in day(s) (range)    |
| Quagliarella et al (2008a)  | Italy      | Exploratory | Sensor (single-axis accelerometer)             | N.s.                       | N.a.                                                                                                                               | N.a.                                                            | Yes                             | 10                       | 76 (3)                          | 5                  | N.s.                                     |
| Quagliarella et al. (2008b) | Italy      | Exploratory | Device (triaxial transducer, data-logger SARI) | Waist                      | N.a.                                                                                                                               | N.a.                                                            | Yes                             | 10                       | 76 (3)                          | 5                  | N.s.                                     |
| Rantz et al (2013)          | USA        | Exploratory | N.a.                                           | N.a.                       | Sensor system: pulse-Doppler range control radar (General Electric <sup>®</sup> ), Microsoft Kinect <sup>®</sup> , two web cameras | Radar: Next front door, Kinect: above front door; Cameras, N.s. | Yes                             | 15                       | 57 (23-67)                      | 8                  |                                          |
|                             |            |             |                                                |                            |                                                                                                                                    |                                                                 |                                 | 17 (after one year n=11) | 88 (67-98)                      | 10                 | 1.5 years                                |
| Sixsmith & Johnson (2004)   | UK         | Exploratory | N.a.                                           | N.a.                       | Infrared array technology                                                                                                          | Wall-mounted close to ceiling                                   | Yes                             | 28                       | N.s. (65-82)                    | N.s.               | N.a.                                     |
| Soaz et al (2012)           | Germany    | Exploratory | Actibelt <sup>®</sup> (3D accelerometer)       | Waist                      | N.a.                                                                                                                               | N.a.                                                            | No                              | 5                        | 70 (N.s)                        | 5                  | N.s. clearly                             |
| Stone & Skubic (2014)       | USA        | Evaluation  | N.a.                                           | N.a.                       | Microsoft Kinect <sup>®</sup> (depth imaging sensor)                                                                               | Wall-mounted close to ceiling                                   | No                              | 16                       | N.s. (67-97)                    | 9                  | One year                                 |
| Tamrat et al (2012)         | USA, India | Exploratory | Sensors (tri-axial accelerometer)              | Each wrist, each hip, neck | N.a.                                                                                                                               | N.a.                                                            | No                              | 12                       | 79 (66-91)                      | 64 %               | 6 or 12 (non-consecutive), 4.8h/day (SD) |

| Author(s) and year       | Country          | Design      | Type of fall detection system                                     |                         |               |           | Fall detection alert (yes / no) | Involved older people |                                 |                    |                                       |
|--------------------------|------------------|-------------|-------------------------------------------------------------------|-------------------------|---------------|-----------|---------------------------------|-----------------------|---------------------------------|--------------------|---------------------------------------|
|                          |                  |             | Wearable                                                          | Placement               | Environmental | Placement |                                 | Sample size (n)       | Mean age in years (range or SD) | Gender: female (n) | Length of test time in day(s) (range) |
|                          |                  |             |                                                                   |                         |               |           |                                 |                       |                                 |                    | 3.2)                                  |
| van de Ven et al (2008a) | Ireland          | Exploratory | Sensor (tri-axial accelerometer) & mobile phone                   | chest                   | N.a.          | N.a.      | Yes                             | N.s.                  | N.s., elderly                   | N.s.               | <8 hours per day for four weeks       |
| van de Ven et al (2008b) | Ireland          | Exploratory | Sensor (tri-axial accelerometer) & mobile phone                   | Chest or under left arm | N.a.          | N.a.      | Yes                             | N.s.                  | N.s., elderly                   | N.s.               | <8 hours per day for four weeks       |
| Wang et al (2014)        | China, Korea, UK | Exploratory | Sensor (accelerometer) & mobile phone                             | Chest                   | N.a.          | N.a.      | Yes                             | N.s.                  | N.s. (50-70)                    | N.s.               | Two weeks                             |
| Wu & Xue (2010)          | USA              | Exploratory | Sensor (tri-axial accelerometer)                                  | Waist                   | N.a.          | N.a.      | No                              | 14                    | N.s. (72-91)                    | N.s.               | 40-60 minutes                         |
| Wu & Xue (2008)          | USA              | Feasibility | Sensor (tri-axial accelerometer and triaxial angular rate sensor) | Waist                   | N.a.          | N.a.      | No                              | 14                    | N.s. (72-91)                    | N.s.               | N.s.                                  |
| Zhang et al (2006)       | China            | Exploratory | Sensor (tri-axial accelerometer)                                  | Waist                   | N.a.          | N.a.      | No                              | 12                    | N.s. (10-70)                    | 4                  | N.s.                                  |
| John et al (2008)        | UK               | Exploratory | PreventFall Monitor (accelerometers)                              | Waist                   | N.a.          | N.a.      | No                              | 5                     | N.s. (71-84)                    | 2                  | 263 (total)                           |

\*1 Not stated; \*2 Not applicable
