# Supplementary material for: Involvement of older people in the development of fall detection systems: a scoping review
Source: Springer Nature journal article supplement (doi:10.1186/s12877-016-0216-3), 2016-02-11
Supplement: MOESM2 [file 9738968]

## Involvement of Older People in the Development of Fall Detection Systems: A Scoping Review

Table 2: Descriptive characteristics of the older people involved in the development of fall detection systems

| Characteristics (x= yes, described)    | Author(s) (Year) | Abbate et al (2012) | Ariani et al (2010) | Barralon et al (2013) | Bloch et al (2011) | Bourke et al (2008a) | Bourke et al (2007) | Bourke et al (2012) | Bourke et al (2010a) | Bourke et al (2010b) | Bourke et al (2008b) | Bourke et al (2010c) | Bourke et al (2008c) | Boyle & Karunanithi (2008) | Campo et al (2010) | Che-Chang et al (2007) | Demiris et al (2004) | Fourty et al (2009) | Marquis-Faulkes et al (2005) | Gietzelt et al (2012) | Godfrey et al (2011) |
|----------------------------------------|------------------|---------------------|---------------------|-----------------------|--------------------|----------------------|---------------------|---------------------|----------------------|----------------------|----------------------|----------------------|----------------------|----------------------------|--------------------|------------------------|----------------------|---------------------|------------------------------|-----------------------|----------------------|
| <b>Without characteristics</b>         |                  |                     |                     |                       |                    |                      |                     |                     |                      |                      | X                    |                      | X                    |                            |                    | X                      |                      |                     |                              |                       |                      |
| <b>Age</b>                             |                  | X                   | X                   | X                     | X                  | X                    | X                   | X                   | X                    | X                    |                      | X                    |                      | X                          | X                  |                        | X                    | X                   | X                            | X                     | X                    |
| <b>Gender</b>                          |                  | X                   | X                   |                       |                    | X                    | X                   | X                   | X                    | X                    |                      |                      |                      |                            |                    |                        |                      | X                   | X                            | X                     | X                    |
| <b>Height and/or Weight and/or BMI</b> |                  |                     | X                   |                       |                    |                      |                     |                     |                      | X                    |                      |                      |                      |                            |                    |                        |                      |                     |                              |                       |                      |
| <b>Healthy</b>                         |                  |                     |                     |                       |                    |                      |                     |                     | X                    | X                    |                      | X                    |                      |                            |                    |                        |                      | X                   |                              |                       | X                    |
| <b>Fall risk</b>                       |                  |                     |                     |                       |                    |                      |                     |                     |                      |                      |                      |                      |                      |                            |                    |                        |                      |                     |                              |                       |                      |
| No risk                                |                  |                     |                     |                       |                    |                      |                     |                     |                      |                      |                      |                      |                      |                            |                    |                        |                      |                     |                              |                       |                      |
| At risk                                |                  |                     |                     |                       | X                  |                      |                     |                     |                      |                      |                      |                      |                      |                            |                    |                        |                      |                     |                              |                       |                      |
| At high risk                           |                  |                     |                     |                       |                    |                      |                     |                     |                      |                      |                      |                      |                      | X                          |                    |                        |                      |                     |                              |                       |                      |
| <b>Fear of falling (x=yes)</b>         |                  |                     |                     |                       |                    |                      |                     |                     |                      |                      |                      |                      |                      |                            |                    |                        |                      |                     |                              |                       |                      |
| <b>Fall history</b>                    |                  |                     |                     |                       |                    |                      |                     |                     |                      |                      |                      |                      |                      |                            |                    |                        |                      |                     |                              |                       |                      |
| With                                   |                  |                     |                     |                       |                    |                      |                     |                     |                      |                      |                      |                      |                      |                            |                    |                        |                      | X                   | X                            | X                     |                      |
| Without                                |                  |                     |                     |                       |                    |                      |                     |                     |                      |                      |                      |                      |                      |                            |                    |                        |                      | X                   |                              |                       |                      |

  

| Characteristics                        | Author(s) (Year) | Goevercin et al (2010) | Holzinger et al (2010) | Horton (2008) | Huang et al (2012) | Jantaraprim et al (2012) | Kangas et al (2012) | Kangas et al (2009) | Kerdegari et al (2012) | Lai et al (2010) | Lai et al (2011) | Lindemann et al (2005) | Shimoto et al (2013) | Liu & Lockhart (2013) | Londei et al (2009) | McKenna et al (2006) | Yu et al (2013) | Narasimhan (2012) | Parker et al (2008) | Quagliarella et al (2008a) | Quagliarella et al (2008b) | Rantz et al (2013) |
|----------------------------------------|------------------|------------------------|------------------------|---------------|--------------------|--------------------------|---------------------|---------------------|------------------------|------------------|------------------|------------------------|----------------------|-----------------------|---------------------|----------------------|-----------------|-------------------|---------------------|----------------------------|----------------------------|--------------------|
| <b>Without characteristics</b>         |                  |                        |                        |               |                    |                          |                     |                     |                        | X                | X                |                        |                      |                       |                     |                      | X               |                   |                     |                            |                            |                    |
| <b>Age</b>                             |                  | X                      | X                      | X             | X                  | X                        | X                   | X                   | X                      |                  |                  | X                      | X                    | X                     | X                   | X                    |                 | X                 | X                   | X                          | X                          | X                  |
| <b>Gender</b>                          |                  | X                      |                        | X             |                    | X                        | X                   |                     |                        |                  |                  | X                      |                      |                       | X                   |                      |                 | X                 | X                   | X                          | X                          | X                  |
| <b>Height and/or Weight and/or BMI</b> |                  |                        |                        |               |                    |                          |                     |                     |                        |                  |                  |                        |                      | X                     |                     |                      |                 | X                 |                     | X                          | X                          |                    |
| <b>Healthy</b>                         |                  |                        |                        |               | X                  |                          |                     |                     |                        |                  |                  | X                      |                      |                       |                     |                      |                 |                   |                     | X                          | X                          |                    |

| Characteristics                | Author(s) (Year) | Goevercin et al (2010) | Holzinger et al (2010) | Horton (2008) | Huang et al (2012) | Jantaraprim et al (2012) | Kangas et al (2012) | Kangas et al (2009) | Kerdegarı et al (2012) | Lai et al (2010) | Lai et al (2011) | Lindemann et al (2005) | Shinmoto et al (2013) | Liu & Lockhart (2013) | Londei et al (2009) | McKenna et al (2006) | Yu et al (2013) | Narasimhan (2012) | Parker et al (2008) | Quagliarella et al (2008a) | Quagliarella et al (2008b) | Rantz et al (2013) |   |
|--------------------------------|------------------|------------------------|------------------------|---------------|--------------------|--------------------------|---------------------|---------------------|------------------------|------------------|------------------|------------------------|-----------------------|-----------------------|---------------------|----------------------|-----------------|-------------------|---------------------|----------------------------|----------------------------|--------------------|---|
| <b>Fall risk</b>               |                  |                        |                        |               |                    |                          |                     |                     |                        |                  |                  |                        |                       |                       |                     |                      |                 |                   |                     |                            |                            |                    | X |
| No risk                        |                  |                        |                        |               |                    |                          |                     |                     |                        |                  |                  |                        |                       |                       |                     |                      |                 |                   |                     |                            |                            |                    |   |
| At risk                        |                  | X                      |                        | X             |                    |                          |                     |                     |                        |                  |                  | X                      |                       |                       |                     |                      |                 |                   |                     |                            |                            |                    |   |
| At high risk                   |                  | X                      |                        |               |                    |                          |                     |                     |                        |                  |                  |                        |                       |                       |                     |                      |                 |                   |                     |                            |                            |                    |   |
| <b>Fear of falling (x=yes)</b> |                  | X                      |                        |               |                    |                          |                     |                     |                        |                  |                  |                        |                       |                       |                     |                      |                 |                   |                     |                            |                            |                    |   |
| <b>Fall history</b>            |                  |                        |                        |               |                    |                          |                     |                     |                        |                  |                  |                        |                       |                       |                     |                      |                 |                   |                     |                            |                            |                    |   |
| With                           |                  | X                      |                        | X             |                    |                          |                     | X                   |                        |                  |                  |                        |                       |                       | X                   | X                    |                 |                   |                     |                            |                            |                    |   |
| Without                        |                  | X                      |                        |               |                    |                          |                     |                     |                        |                  |                  |                        |                       |                       |                     |                      |                 |                   | X                   |                            |                            |                    |   |

| Characteristics                        | Author(s) (Year) | Sixsmith & Johnson (2004) | Soaz et al (2012) | Stone & Skubic (2014) | Tamrat et al (2012) | van de Ven et al (2008a) | van de Ven et al (2008b) | Wang et al (2014) | Wu & Xue (2010) | Wu & Xue (2008) | Zhang et al (2006) | John et al (2008) |
|----------------------------------------|------------------|---------------------------|-------------------|-----------------------|---------------------|--------------------------|--------------------------|-------------------|-----------------|-----------------|--------------------|-------------------|
| <b>Without characteristics</b>         |                  |                           |                   |                       |                     | X                        | X                        |                   |                 |                 |                    |                   |
| <b>Age</b>                             |                  | X                         | X                 | X                     | X                   |                          |                          | X                 | X               | X               | X                  | X                 |
| <b>Gender</b>                          |                  |                           | X                 | X                     | X                   |                          |                          |                   |                 |                 |                    | X                 |
| <b>Height and/or Weight and/or BMI</b> |                  |                           |                   |                       |                     |                          |                          |                   |                 |                 |                    | X                 |
| <b>Healthy</b>                         |                  |                           |                   |                       |                     |                          |                          |                   |                 |                 |                    |                   |
| <b>Fall risk</b>                       |                  |                           |                   |                       |                     |                          |                          |                   |                 |                 |                    |                   |
| No risk                                |                  |                           |                   |                       |                     |                          |                          |                   |                 |                 |                    |                   |
| At risk                                |                  |                           |                   |                       |                     |                          |                          |                   |                 |                 |                    |                   |
| At high risk                           |                  |                           |                   |                       | X                   |                          |                          |                   |                 |                 |                    |                   |
| <b>Fear of falling (x=yes)</b>         |                  |                           |                   |                       |                     |                          |                          |                   |                 |                 |                    |                   |
| <b>Fall history</b>                    |                  |                           |                   |                       |                     |                          |                          |                   |                 |                 |                    |                   |
| With                                   |                  |                           |                   |                       | X                   |                          |                          |                   |                 |                 |                    |                   |
| Without                                |                  |                           |                   |                       |                     |                          |                          |                   |                 |                 |                    |                   |
