# Supplementary material for: Involvement of older people in the development of fall detection systems: a scoping review
Source: Springer Nature journal article supplement (doi:10.1186/s12877-016-0216-3), 2016-02-11
Supplement: MOESM3 [file 9738968]

## Involvement of Older People in the Development of Fall Detection Systems: A Scoping Review

Table 3: Focus and stage(s) of involvement of older people in the development of fall detection systems

| Author(s)<br>and year                                 | Involvement of older people |           |              |      |          |                                             |                                                                                                                                                                      |                             |                                                     |                 | Stages of involvement <sup>4</sup>         |                                                   |                                                          |                                                |  |
|-------------------------------------------------------|-----------------------------|-----------|--------------|------|----------|---------------------------------------------|----------------------------------------------------------------------------------------------------------------------------------------------------------------------|-----------------------------|-----------------------------------------------------|-----------------|--------------------------------------------|---------------------------------------------------|----------------------------------------------------------|------------------------------------------------|--|
|                                                       | Focus of involvement        |           |              |      |          |                                             |                                                                                                                                                                      |                             |                                                     |                 | I                                          | II                                                | III                                                      | IV                                             |  |
|                                                       | Technical aspects           |           |              |      |          | Views of older people                       |                                                                                                                                                                      |                             |                                                     |                 | I<br>Idea Generation & Concept Development | II<br>Device (Re-) Design & Prototype Development | III<br>Prototype Testing in-House & Trials in Real Field | IV<br>Deployment in the Market & User Feedback |  |
|                                                       | Simulation / performance    |           |              |      |          | Focus group interview (s)<br>WITH prototype | Focus group interview (s)<br>Focus group interview (s)<br>WITH visual material - power<br>point presentation (fall<br>detection system) or video<br>(fall scenarios) | Single interview (s)        | Single interview (s) WITH<br>video (fall scenarios) | Questionnaire/s |                                            |                                                   |                                                          |                                                |  |
| Scripted ADL <sup>3</sup><br>Everyday life activities | Setting                     |           | N.s. clearly |      |          |                                             |                                                                                                                                                                      |                             |                                                     |                 |                                            |                                                   |                                                          |                                                |  |
|                                                       | Lab                         | Real-life |              | Home | Hospital | Nursing home                                | Community centre                                                                                                                                                     | Independent living facility | Long-term care facility                             |                 |                                            |                                                   |                                                          |                                                |  |
| Abbate et al (2012)                                   | N.a.                        | N.a.      |              |      |          |                                             |                                                                                                                                                                      |                             |                                                     | X               |                                            |                                                   | X                                                        |                                                |  |
| Ariani et al (2010)                                   | X                           | X         |              |      |          |                                             |                                                                                                                                                                      |                             |                                                     |                 |                                            |                                                   | X                                                        |                                                |  |
| Barralon et al (2013)                                 | X                           | X         |              |      |          |                                             |                                                                                                                                                                      |                             |                                                     |                 |                                            |                                                   | X                                                        |                                                |  |
| Bloch et al (2011)                                    | X                           | X         |              |      |          |                                             |                                                                                                                                                                      |                             |                                                     |                 |                                            |                                                   | X                                                        |                                                |  |
| Bourke et al (2008a)                                  | X                           | X         |              |      |          |                                             |                                                                                                                                                                      |                             |                                                     |                 |                                            |                                                   | X                                                        |                                                |  |
| Bourke et al (2007)                                   | X                           | X         |              |      |          |                                             |                                                                                                                                                                      |                             |                                                     |                 |                                            |                                                   | X                                                        |                                                |  |
| Bourke et al (2012)                                   | X                           | X         |              |      |          |                                             |                                                                                                                                                                      |                             |                                                     |                 |                                            | X                                                 |                                                          |                                                |  |
| Bourke et al (2010a)                                  | X                           | X         | X            |      |          |                                             |                                                                                                                                                                      |                             |                                                     |                 |                                            |                                                   |                                                          | X                                              |  |
| Bourke et al (2010b)                                  | X                           | X         | X            |      |          |                                             |                                                                                                                                                                      |                             |                                                     |                 |                                            |                                                   |                                                          | X                                              |  |
| Bourke et al (2008b)                                  | X                           | X         |              |      |          |                                             |                                                                                                                                                                      |                             |                                                     |                 |                                            |                                                   | X                                                        |                                                |  |
| Bourke et al (2010c)                                  | X                           | X         | X            |      |          |                                             |                                                                                                                                                                      |                             |                                                     |                 |                                            |                                                   |                                                          | X                                              |  |

| Author(s)<br>and year         | Involvement of older people |          |              |                  |                             |                                             |                           |                                                                                                                                         |                      |                                                     |                                    |                                          |                                                |                                                      |                                             |  |
|-------------------------------|-----------------------------|----------|--------------|------------------|-----------------------------|---------------------------------------------|---------------------------|-----------------------------------------------------------------------------------------------------------------------------------------|----------------------|-----------------------------------------------------|------------------------------------|------------------------------------------|------------------------------------------------|------------------------------------------------------|---------------------------------------------|--|
|                               | Focus of involvement        |          |              |                  |                             |                                             |                           |                                                                                                                                         |                      |                                                     | Stages of involvement <sup>4</sup> |                                          |                                                |                                                      |                                             |  |
|                               | Technical aspects           |          |              |                  |                             | Views of older people                       |                           |                                                                                                                                         |                      |                                                     |                                    | I                                        | II                                             | III                                                  | IV                                          |  |
|                               | Simulation / performance    |          |              |                  |                             | Focus group interview (s)<br>WITH prototype | Focus group interview (s) | Focus group interview (s)<br>WITH visual material - power<br>point presentation (fall<br>detection system) or video<br>(fall scenarios) | Single interview (s) | Single interview (s) WITH<br>video (fall scenarios) | Questionnaire/s                    | Idea Generation & Concept<br>Development | Device (Re-) Design &<br>Prototype Development | Prototype Testing in-House &<br>Trials in Real Field | Deployment in the Market &<br>User Feedback |  |
| Scripted ADL <sup>3</sup>     | Everyday life activities    | Setting  |              | N.s. clearly     |                             |                                             |                           |                                                                                                                                         |                      |                                                     |                                    |                                          |                                                |                                                      |                                             |  |
|                               |                             | Lab      | Real-life    |                  |                             |                                             |                           |                                                                                                                                         |                      |                                                     |                                    |                                          |                                                |                                                      |                                             |  |
|                               | Home                        | Hospital | Nursing home | Community centre | Independent living facility | Long-term care facility                     |                           |                                                                                                                                         |                      |                                                     |                                    |                                          |                                                |                                                      |                                             |  |
| Bourke et al (2008c)          | X                           |          | X            |                  |                             |                                             |                           |                                                                                                                                         |                      |                                                     |                                    |                                          | X                                              |                                                      |                                             |  |
| Boyle & Karunanithi (2008)    | X                           |          | X            |                  |                             |                                             |                           |                                                                                                                                         |                      |                                                     |                                    |                                          | X                                              |                                                      |                                             |  |
| Campo et al (2010)            | X                           |          | X            |                  |                             |                                             |                           |                                                                                                                                         |                      |                                                     |                                    |                                          | X                                              |                                                      |                                             |  |
| Che-Chang et al (2007)        | X                           |          |              |                  |                             | X                                           |                           |                                                                                                                                         |                      |                                                     |                                    | X                                        |                                                |                                                      |                                             |  |
| De la Guia Solaz et al (2010) | X                           | X        |              |                  |                             |                                             |                           |                                                                                                                                         |                      |                                                     |                                    |                                          | X                                              |                                                      |                                             |  |
| Demiris et al (2004)          | N.a.                        | N.a.     |              |                  |                             |                                             | X                         |                                                                                                                                         |                      |                                                     | X                                  |                                          |                                                |                                                      |                                             |  |
| Fourty et al (2009)           | X                           |          |              |                  |                             | X                                           |                           |                                                                                                                                         |                      |                                                     |                                    | X                                        | X                                              |                                                      |                                             |  |
| Marquis-Faulkes et al (2005)  | N.a.                        | N.a.     |              |                  |                             |                                             | X                         |                                                                                                                                         |                      |                                                     |                                    | X                                        |                                                |                                                      |                                             |  |
| Gietzelt et al (2012)         | X                           | X        |              |                  |                             |                                             |                           | X                                                                                                                                       |                      |                                                     |                                    |                                          | X                                              |                                                      |                                             |  |
| Godfrey et al (2011)          | X                           | X        |              |                  |                             |                                             |                           |                                                                                                                                         |                      |                                                     |                                    |                                          | X                                              |                                                      |                                             |  |
| Goevercin et al (2010)        | N.a.                        | N.a.     |              |                  |                             |                                             | X                         |                                                                                                                                         |                      | X                                                   | X                                  |                                          |                                                |                                                      |                                             |  |
| Holzinger et al (2010)        | N.a.                        | N.a.     |              |                  |                             | X                                           |                           |                                                                                                                                         |                      | X                                                   |                                    | X                                        |                                                |                                                      |                                             |  |

| Author(s)<br>and year     | Involvement of older people |          |              |                  |                             |                                             |                           |                                                                                                                                         |                      |                                                     |                                    |                                          |                                                |                                                      |                                             |   |
|---------------------------|-----------------------------|----------|--------------|------------------|-----------------------------|---------------------------------------------|---------------------------|-----------------------------------------------------------------------------------------------------------------------------------------|----------------------|-----------------------------------------------------|------------------------------------|------------------------------------------|------------------------------------------------|------------------------------------------------------|---------------------------------------------|---|
|                           | Focus of involvement        |          |              |                  |                             |                                             |                           |                                                                                                                                         |                      |                                                     | Stages of involvement <sup>4</sup> |                                          |                                                |                                                      |                                             |   |
|                           | Technical aspects           |          |              |                  |                             | Views of older people                       |                           |                                                                                                                                         |                      |                                                     |                                    | I                                        | II                                             | III                                                  | IV                                          |   |
|                           | Simulation / performance    |          |              |                  |                             | Focus group interview (s)<br>WITH prototype | Focus group interview (s) | Focus group interview (s)<br>WITH visual material - power<br>point presentation (fall<br>detection system) or video<br>(fall scenarios) | Single interview (s) | Single interview (s) WITH<br>video (fall scenarios) | Questionnaire/s                    | Idea Generation & Concept<br>Development | Device (Re-) Design &<br>Prototype Development | Prototype Testing in-House &<br>Trials in Real Field | Deployment in the Market &<br>User Feedback |   |
| Scripted ADL <sup>3</sup> | Everyday life activities    | Setting  |              |                  | N.s. clearly                |                                             |                           |                                                                                                                                         |                      |                                                     |                                    |                                          |                                                |                                                      |                                             |   |
|                           |                             | Lab      | Real-life    |                  |                             |                                             |                           |                                                                                                                                         |                      |                                                     |                                    |                                          |                                                |                                                      |                                             |   |
|                           | Home                        | Hospital | Nursing home | Community centre | Independent living facility | Long-term care facility                     |                           |                                                                                                                                         |                      |                                                     |                                    |                                          |                                                |                                                      |                                             |   |
| Horton (2008)             | N.a.                        | N.a.     |              |                  |                             |                                             |                           | X                                                                                                                                       |                      |                                                     |                                    |                                          |                                                |                                                      |                                             | X |
| Huang et al (2012)        | X                           |          |              |                  |                             |                                             |                           |                                                                                                                                         |                      |                                                     |                                    |                                          |                                                | X                                                    |                                             |   |
| Jantaraprim et al (2012)  | X                           |          |              |                  |                             |                                             |                           |                                                                                                                                         |                      |                                                     |                                    |                                          |                                                | X                                                    |                                             |   |
| Kangas et al (2012)       | X                           |          |              | X                |                             |                                             |                           |                                                                                                                                         |                      |                                                     |                                    |                                          |                                                | X                                                    |                                             |   |
| Kangas et al (2009)       | X                           |          |              | X                |                             |                                             |                           |                                                                                                                                         |                      |                                                     |                                    |                                          |                                                | X                                                    |                                             |   |
| Kerdegari et al (2012)    | X                           | X        |              |                  |                             |                                             |                           |                                                                                                                                         |                      |                                                     |                                    |                                          |                                                | X                                                    |                                             |   |
| Lai et al (2010)          | X                           | X        |              |                  |                             |                                             |                           |                                                                                                                                         |                      |                                                     |                                    |                                          |                                                | X                                                    |                                             |   |
| Lai et al (2011)          | X                           | X        |              |                  |                             |                                             |                           |                                                                                                                                         |                      |                                                     |                                    |                                          |                                                | X                                                    |                                             |   |
| Lindemann et al (2005)    | X                           |          |              |                  |                             | X                                           |                           |                                                                                                                                         |                      |                                                     |                                    |                                          |                                                | X                                                    |                                             |   |
| Shinmoto et al (2013)     | X                           |          | X            |                  |                             |                                             |                           |                                                                                                                                         |                      | X                                                   |                                    |                                          |                                                | X                                                    |                                             |   |
| Liu & Lockhart (2013)     | X                           | X        |              |                  |                             |                                             |                           |                                                                                                                                         |                      |                                                     |                                    |                                          |                                                | X                                                    |                                             |   |
| Londei et al (2009)       | N.a.                        | N.a.     |              |                  |                             |                                             |                           | X                                                                                                                                       | X                    |                                                     |                                    |                                          |                                                | X                                                    |                                             |   |
| McKenna et al (2006)      | N.a.                        | N.a.     |              |                  |                             |                                             | X                         | X                                                                                                                                       |                      |                                                     |                                    |                                          |                                                | X                                                    |                                             |   |

| Author(s)<br>and year                                 | Involvement of older people |           |      |          |              |                       |                             |                         |              |                                             | Stages of involvement <sup>4</sup>                                                                                                                                   |                      |                                                     |                 |                                          |                                                |                                                      |                                             |
|-------------------------------------------------------|-----------------------------|-----------|------|----------|--------------|-----------------------|-----------------------------|-------------------------|--------------|---------------------------------------------|----------------------------------------------------------------------------------------------------------------------------------------------------------------------|----------------------|-----------------------------------------------------|-----------------|------------------------------------------|------------------------------------------------|------------------------------------------------------|---------------------------------------------|
|                                                       | Focus of involvement        |           |      |          |              |                       |                             |                         |              |                                             |                                                                                                                                                                      |                      |                                                     |                 |                                          |                                                |                                                      |                                             |
|                                                       | Technical aspects           |           |      |          |              | Views of older people |                             |                         |              |                                             | I                                                                                                                                                                    | II                   | III                                                 | IV              |                                          |                                                |                                                      |                                             |
|                                                       | Simulation / performance    |           |      |          |              |                       |                             |                         |              |                                             |                                                                                                                                                                      |                      |                                                     |                 |                                          |                                                |                                                      |                                             |
| Scripted ADL <sup>3</sup><br>Everyday life activities | Setting                     |           |      |          |              |                       |                             |                         |              | Focus group interview (s)<br>WITH prototype | Focus group interview (s)<br>Focus group interview (s)<br>WITH visual material - power<br>point presentation (fall<br>detection system) or video<br>(fall scenarios) | Single interview (s) | Single interview (s) WITH<br>video (fall scenarios) | Questionnaire/s | Idea Generation & Concept<br>Development | Device (Re-) Design &<br>Prototype Development | Prototype Testing in-House &<br>Trials in Real Field | Deployment in the Market &<br>User Feedback |
|                                                       | Lab                         | Real-life | Home | Hospital | Nursing home | Community centre      | Independent living facility | Long-term care facility | N.s. clearly |                                             |                                                                                                                                                                      |                      |                                                     |                 |                                          |                                                |                                                      |                                             |
| Yu et al (2013)                                       | X                           |           |      |          |              |                       |                             |                         |              | X                                           |                                                                                                                                                                      |                      |                                                     |                 | X                                        |                                                |                                                      |                                             |
| Narasimhan (2012)                                     | X                           |           |      |          | X            |                       |                             |                         |              |                                             |                                                                                                                                                                      |                      |                                                     |                 | X                                        |                                                |                                                      |                                             |
| Parker et al (2008)                                   | N.a.                        | N.a.      |      |          |              |                       |                             |                         |              |                                             |                                                                                                                                                                      |                      | X                                                   | X               |                                          |                                                |                                                      |                                             |
| Quagliarella et al (2008a)                            | X                           |           |      |          |              |                       |                             |                         |              | X                                           |                                                                                                                                                                      |                      |                                                     |                 | X                                        |                                                |                                                      |                                             |
| Quagliarella et al (2008b)                            | X                           | X         |      |          |              |                       |                             |                         |              |                                             |                                                                                                                                                                      |                      |                                                     |                 |                                          | X                                              |                                                      |                                             |
| Rantz et al (2013)                                    | X X                         | X         |      |          |              | X                     |                             |                         |              |                                             |                                                                                                                                                                      |                      | X                                                   |                 | X                                        | X                                              |                                                      |                                             |
| Sixsmith & Johnson (2004)                             | N.a.                        | N.a.      |      |          |              |                       |                             |                         |              | X                                           |                                                                                                                                                                      |                      |                                                     |                 | X                                        |                                                |                                                      |                                             |
| Soaz et al (2012)                                     | X                           |           |      |          |              |                       |                             |                         |              | X                                           |                                                                                                                                                                      |                      |                                                     |                 |                                          | X                                              |                                                      |                                             |
| Stone & Skubic (2014)                                 | X                           |           |      |          |              | X                     |                             |                         |              |                                             |                                                                                                                                                                      |                      |                                                     |                 |                                          | X                                              |                                                      |                                             |
| Tamrat et al (2012)                                   | X X                         |           |      |          | X            | X                     | X                           |                         |              |                                             |                                                                                                                                                                      |                      |                                                     |                 |                                          | X                                              |                                                      |                                             |
| van de Ven et al (2008a)                              | X                           | X         |      |          |              |                       |                             |                         |              |                                             |                                                                                                                                                                      |                      |                                                     |                 |                                          | X                                              |                                                      |                                             |
| van de Ven et al (2008b)                              | X                           |           |      |          |              |                       | X                           |                         |              |                                             |                                                                                                                                                                      |                      |                                                     |                 |                                          | X                                              |                                                      |                                             |
| Wang et al                                            | X                           |           |      |          |              |                       |                             |                         |              | X                                           |                                                                                                                                                                      |                      |                                                     |                 |                                          | X                                              |                                                      |                                             |

| Author(s)<br>and year                                  | Involvement of older people |           |      |          |                       |                  |                                             | Stages of involvement <sup>*4</sup>                                                                                                                                  |                      |                                                     |                 |                                          |                                                |                                                      |                                             |
|--------------------------------------------------------|-----------------------------|-----------|------|----------|-----------------------|------------------|---------------------------------------------|----------------------------------------------------------------------------------------------------------------------------------------------------------------------|----------------------|-----------------------------------------------------|-----------------|------------------------------------------|------------------------------------------------|------------------------------------------------------|---------------------------------------------|
|                                                        | Focus of involvement        |           |      |          |                       |                  |                                             | I                                                                                                                                                                    | II                   | III                                                 | IV              |                                          |                                                |                                                      |                                             |
|                                                        | Technical aspects           |           |      |          | Views of older people |                  |                                             |                                                                                                                                                                      |                      |                                                     |                 |                                          |                                                |                                                      |                                             |
|                                                        | Simulation / performance    |           |      |          |                       |                  |                                             |                                                                                                                                                                      |                      |                                                     |                 |                                          |                                                |                                                      |                                             |
| Scripted ADL <sup>*3</sup><br>Everyday life activities | Setting                     |           |      |          |                       |                  | Focus group interview (s)<br>WITH prototype | Focus group interview (s)<br>Focus group interview (s)<br>WITH visual material - power<br>point presentation (fall<br>detection system) or video<br>(fall scenarios) | Single interview (s) | Single interview (s) WITH<br>video (fall scenarios) | Questionnaire/s | Idea Generation & Concept<br>Development | Device (Re-) Design &<br>Prototype Development | Prototype Testing in-House &<br>Trials in Real Field | Deployment in the Market &<br>User Feedback |
|                                                        | Lab                         | Real-life | Home | Hospital | Nursing home          | Community centre |                                             |                                                                                                                                                                      |                      |                                                     |                 |                                          |                                                |                                                      |                                             |
| (2014)                                                 |                             |           |      |          |                       |                  |                                             |                                                                                                                                                                      |                      |                                                     |                 |                                          |                                                |                                                      |                                             |
| Wu & Xue (2010)                                        | X                           |           |      |          |                       |                  |                                             |                                                                                                                                                                      |                      |                                                     |                 | X                                        |                                                |                                                      |                                             |
| Wu & Xue (2008)                                        | X                           |           |      |          |                       |                  |                                             |                                                                                                                                                                      |                      |                                                     |                 | X                                        |                                                |                                                      |                                             |
| Zhang et al (2006)                                     | X                           | X         |      |          |                       |                  |                                             |                                                                                                                                                                      |                      |                                                     |                 |                                          | X                                              |                                                      |                                             |
| John et al (2008)                                      | X                           | X         |      |          |                       |                  |                                             |                                                                                                                                                                      |                      |                                                     |                 |                                          | X                                              |                                                      |                                             |

<sup>\*3</sup>Activity of daily living; <sup>\*4</sup>according to Shah et al<sup>33</sup>
